# Supplementary material for: Neoadjuvant Chemotherapy Followed by Radical Surgery versus Radiotherapy (with or without Chemotherapy) in Patients with Stage IB2, IIA, or IIB Cervical Cancer: A Systematic Review and Meta-Analysis
Source: Hindawi journal article supplement (doi:10.1155/2020/7415056), 2020-07-27

Supplemental figure 1

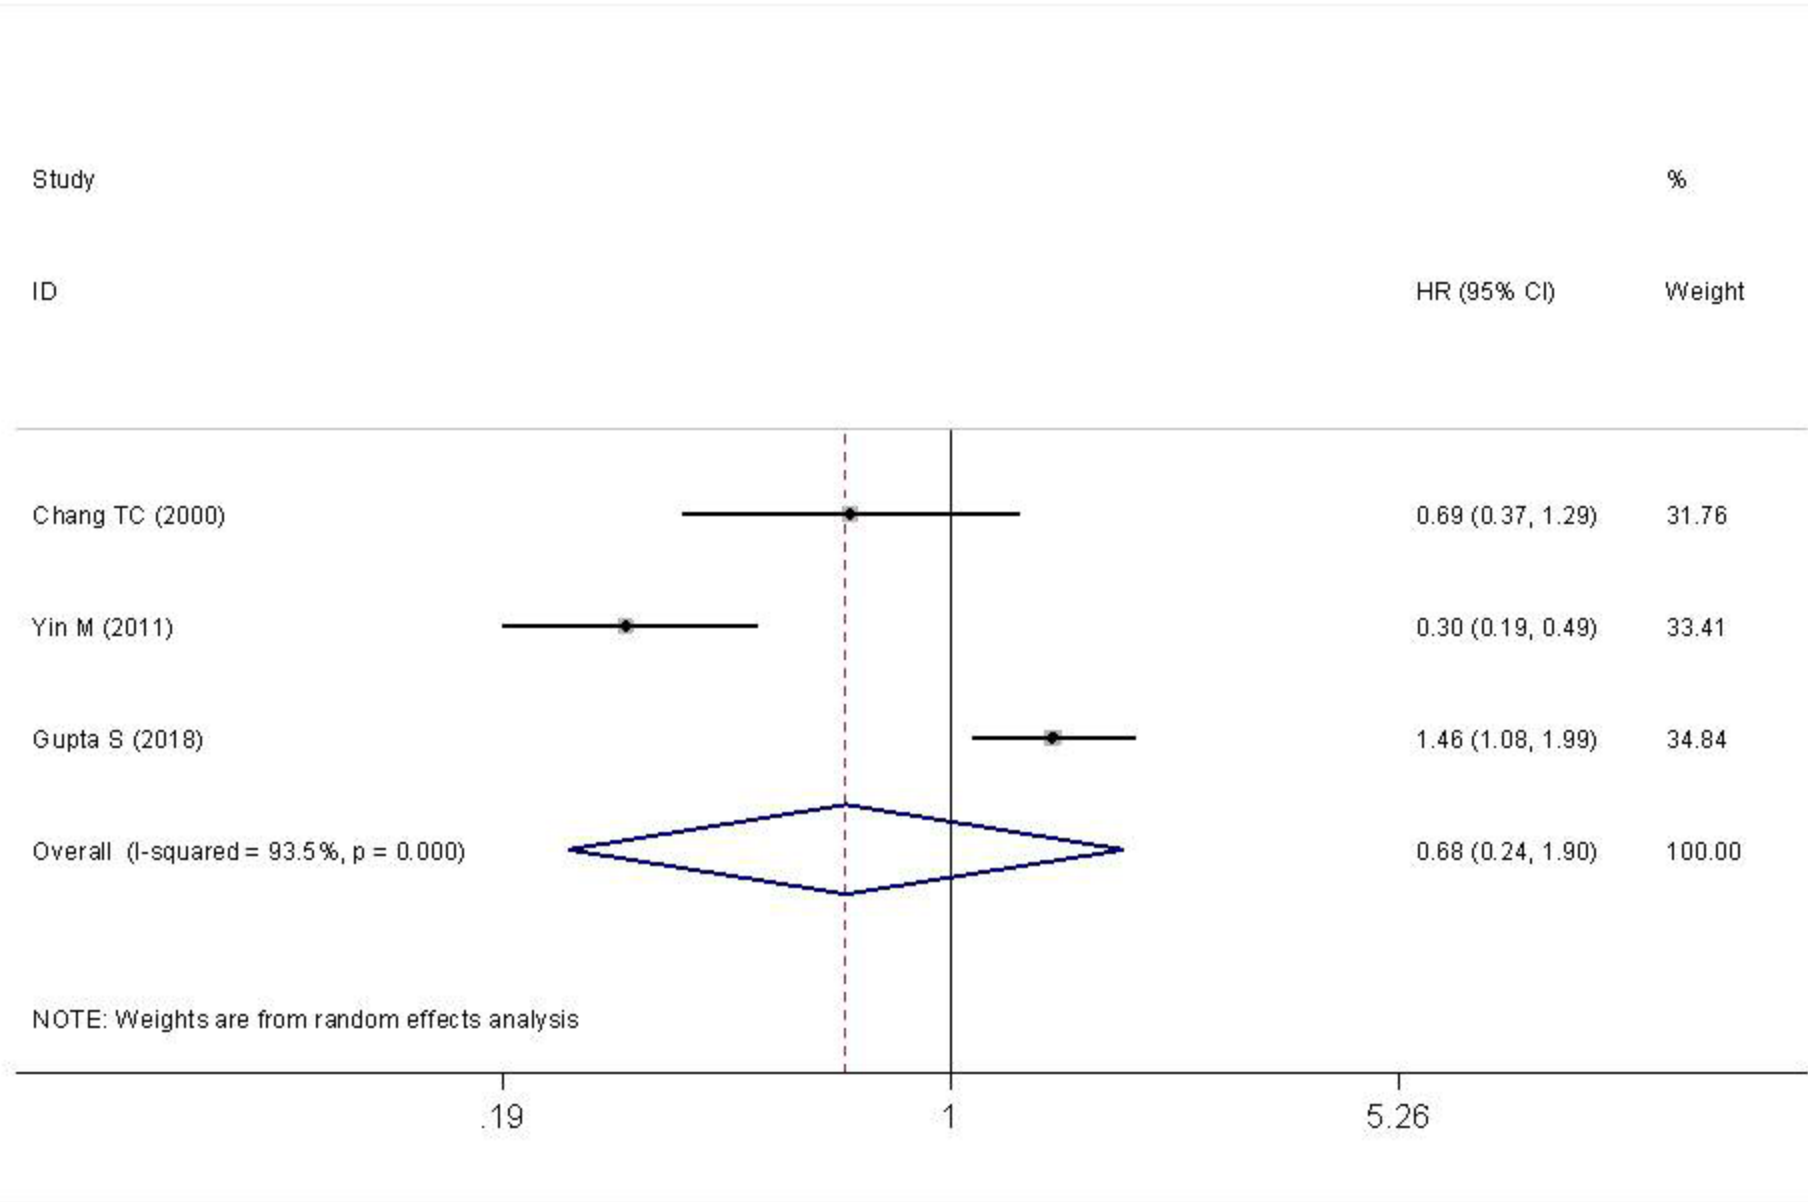

Supplemental table 1. Comparison of adverse events between NACT+RS and CCRT or RT alone for patients with locally advanced cervical cancer

| Adverse events   | NO. | RR    | 95%CI        | P     | I-squared | p      | model  |
|------------------|-----|-------|--------------|-------|-----------|--------|--------|
| Anemia           | 3   | 0.759 | 0.202-2.845  | 0.683 | 87.4%     | <0.001 | random |
| Thrombocytopenia | 3   | 3.240 | 1.575-6.662  | 0.001 | 0.0%      | 0.782  | fixed  |
| Neutropenia      | 2   | 1.323 | 0.891-1.964  | 0.165 | 0.0%      | 0.388  | fixed  |
| Leukopenia       | 2   | 2.263 | 0.068-75.166 | 0.648 | 90.4%     | 0.001  | random |
| Vomiting         | 4   | 0.991 | 0.292-3.357  | 0.988 | 82.1%     | 0.001  | random |
| Diarrhea         | 4   | 0.452 | 0.230-0.890  | 0.022 | 77.6%     | 0.002  | random |
| Neurotoxicity    | 2   | 0.292 | 0.074-1.146  | 0.078 | 52.6%     | 0.146  | fixed  |

Supplemental figure 2

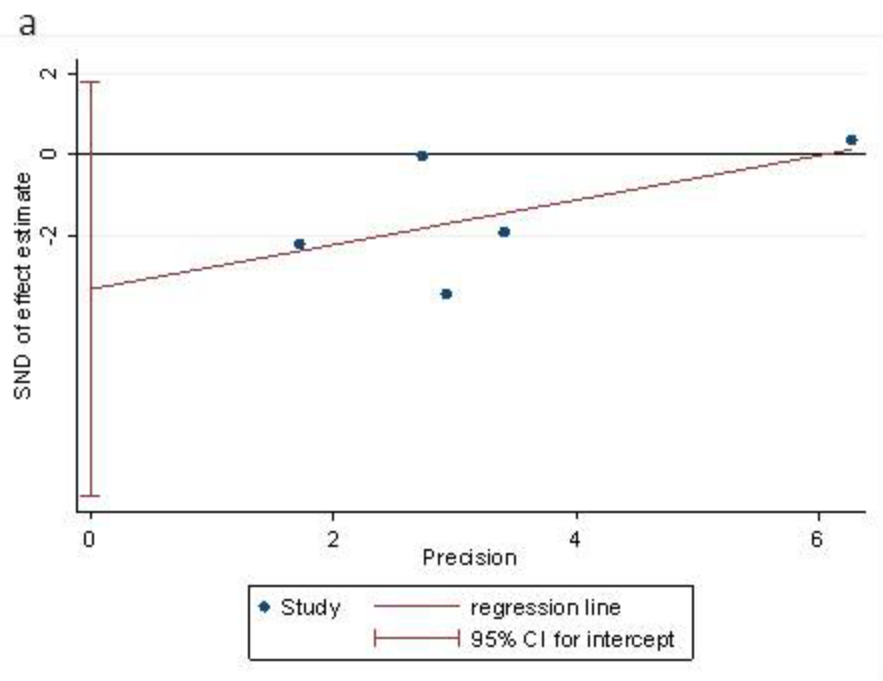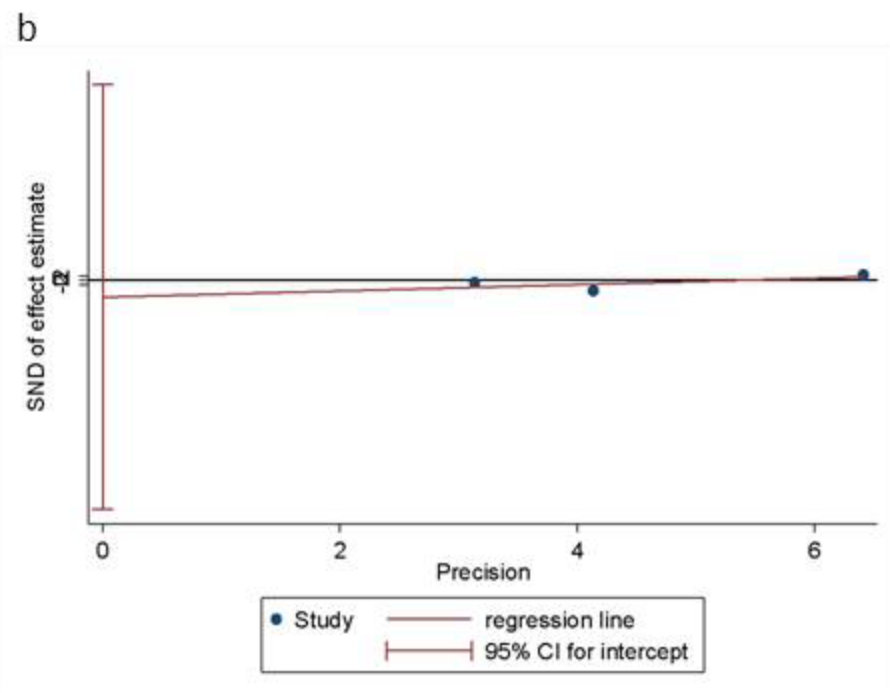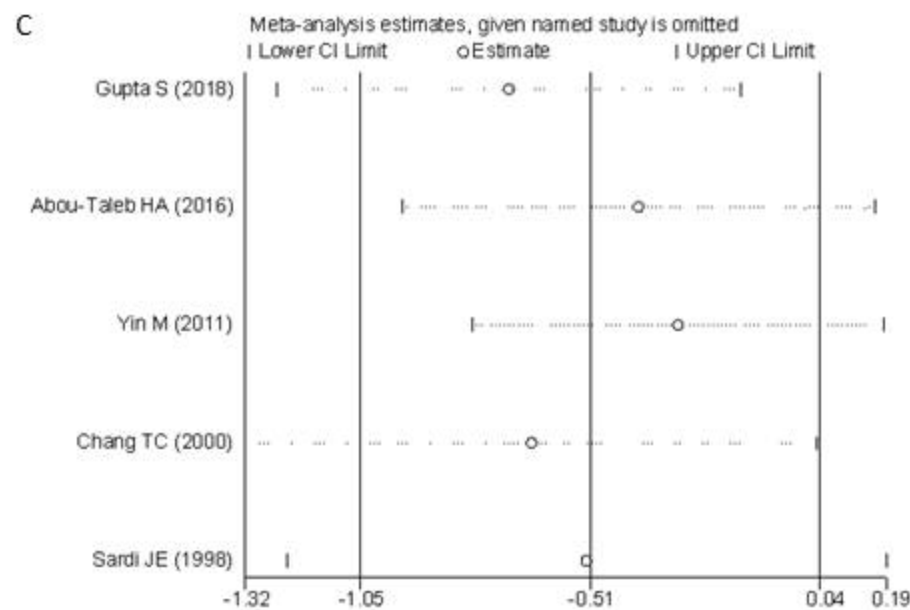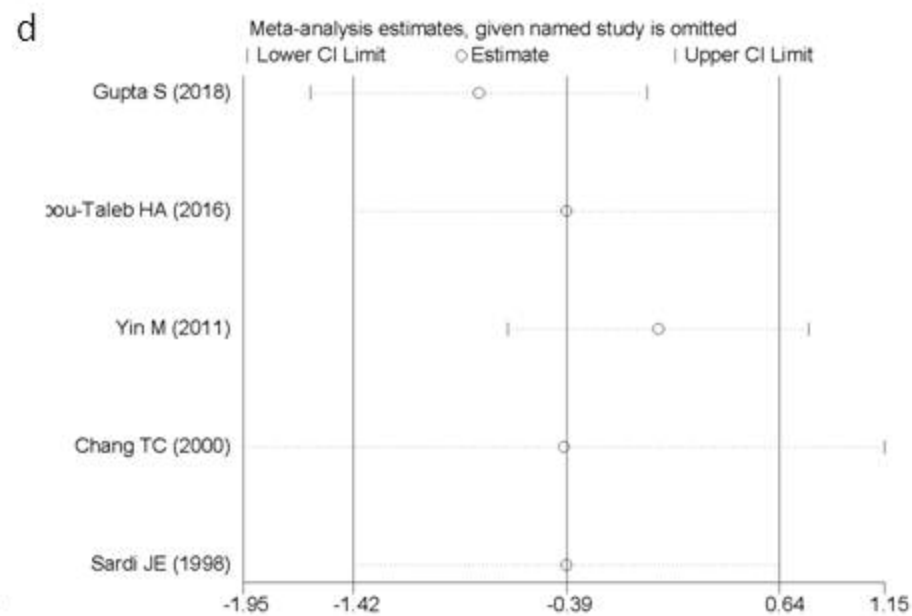

Supplement: f1 [file 7415056.f1.pdf]
